# Supplementary material for: Diagnosis of Gastroesophageal Reflux Disease Using Real-time Magnetic Resonance Imaging
Source: PubMed Central journal article supplement (PMC4648433; doi:10.1038/srep12112), 2015-07-15
Supplement: srep12112-s16.pdf [file srep12112-s16.pdf]

# **Diagnosis of Gastroesophageal Reflux Disease Using Real-time Magnetic Resonance Imaging**

Shuo Zhang, Arun A Joseph, Lisa Gross, Michael Ghadimi, Jens Frahm, Alexander W Beham

## SUPPLEMENTARY APPENDIX

**Table S1. Real-time MRI visibility of gastroesophageal swallowing.**

| Image orientation         |                             | Sagittal | Coronal oblique | Transversal oblique | Coronal double-oblique |
|---------------------------|-----------------------------|----------|-----------------|---------------------|------------------------|
| Oesophageal peristalsis   |                             | √        | √               | (√)                 | √                      |
| Bolus transport           | Oesophagus                  | Middle   | Lower           |                     | Lower                  |
|                           | Lower oesophageal sphincter |          | √               | √                   | √                      |
|                           | Stomach                     |          | √               | √                   | √                      |
| Gastro-oesophageal reflux |                             | (√)      | √               | √                   | √                      |

√ Visible in all cases; (√) visible in limited cases.

**Table S2. DeMeester scores and endoscopic findings in patients (n = 12).**

| <b>Patient</b> | <b>Age</b> | <b>DeMeester score</b> | <b>Endoscopy</b>      |
|----------------|------------|------------------------|-----------------------|
| 1              | 48         | 62.0                   |                       |
| 2              | 58         | 19.6                   | Barrett oesophagus    |
| 3              | 26         | 14.7                   |                       |
| 4              | 64         | 28.8                   |                       |
| 5              | 68         | 73.9                   | Reflux oesophagitis I |
| 6              | 20         | 4.3                    |                       |
| 7              | 58         | 14.7                   |                       |
| 8              | 50         | 150.9                  | Fundoplication        |
| 9              | 54         | 16.5                   |                       |
| 10             | 73         | 26.9                   |                       |
| 11             | 62         | 12.1                   | Reversed stomach      |
| 12             | 47         | 21.6                   |                       |

**Movie S3: Real-time MRI of normal gastroesophageal swallowing – sagittal plane.** The image series at 50 ms resolution covers bolus transport of a single swallow through the lower oesophagus (arrow) of a 26-year-old healthy female ( $2 \times 2$  mm<sup>2</sup> resolution, 8 mm thickness). For details see text and Figure 1A.

**Movie S4: Real-time MRI of normal gastroesophageal swallowing – coronal oblique plane.** The image series at 50 ms resolution covers bolus transport of a single swallow through the oesophagogastric junction (arrow) of a 26-year-old healthy female ( $2 \times 2$  mm<sup>2</sup> resolution, 8 mm thickness). For details see text and Figure 1B.

**Movie S5: Real-time MRI of normal gastroesophageal swallowing – transversal oblique plane.** The image series at 50 ms resolution covers bolus transport of a single swallow through the oesophagogastric junction (arrow) of a 26-year-old healthy female ( $2 \times 2$  mm<sup>2</sup> resolution, 8 mm thickness). For details see text and Figure 1C.

**Movie S6: Real-time MRI of normal gastroesophageal swallowing – coronal double-oblique plane.** The image series at 50 ms resolution covers bolus transport of a single swallow through the oesophagogastric junction (arrow) of a 26-year-old healthy female ( $2 \times 2$  mm<sup>2</sup> resolution, 8 mm thickness). For details see text and Figure 1D.

**Movie S7: Real-time flow MRI (magnitude images) at the lower oesophageal sphincter.** The image series at 50 ms resolution covers bolus transport of a single swallow through the oesophagogastric junction (arrow) of a 26-year-old healthy

female ( $2 \times 2 \text{ mm}^2$  resolution, 6 mm thickness, velocity sensitivity  $60 \text{ cm s}^{-1}$ ). For details see text and Figure 1E.

**Movie S8: Real-time flow MRI (phase-contrast maps) at the lower oesophageal sphincter.** The image series at 50 ms resolution covers bolus transport of a single swallow through the oesophagogastric junction (arrow) of a 26-year-old healthy female ( $2 \times 2 \text{ mm}^2$  resolution, 6 mm thickness, velocity sensitivity  $60 \text{ cm s}^{-1}$ ). For details see text and Figure 1F.

**Movie S9: Real-time MRI of the oesophagogastric junction during Valsalva maneuver – coronal oblique plane.** The image series at 50 ms resolution was obtained from a 26-year-old healthy female ( $2 \times 2 \text{ mm}^2$  resolution, 8 mm thickness, velocity sensitivity  $60 \text{ cm s}^{-1}$ ). For details see text.

**Movie S10: Real-time MRI of the oesophagogastric junction during Valsalva maneuver – transversal oblique plane.** The image series at 50 ms resolution was obtained from a 26-year-old healthy female ( $2 \times 2 \text{ mm}^2$  resolution, 8 mm thickness, velocity sensitivity  $60 \text{ cm s}^{-1}$ ). For details see text.

**Movie S11: Real-time MRI of gastroesophageal reflux in a 61-year-old male patient.** The image series (coronal oblique plane) at 50 ms resolution was obtained during Valsalva maneuver ( $2 \times 2 \text{ mm}^2$  resolution, 8 mm thickness). The arrow indicates the bolus regurgitation. For details see text and Figure 2A.

**Movie S12: Real-time MRI of gastroesophageal swallowing in a 48-year-old male patient with gastric hernia.** The image series (coronal oblique plane) at 50 ms

resolution was obtained during swallowing ( $2 \times 2 \text{ mm}^2$  resolution, 8 mm thickness). Notice the absence of the hiatal hernia. For details see text and Figure 2B.

**Movie S13: Real-time MRI of gastroesophageal reflux in a 48-year-old male patient with gastric hernia.** The image series (coronal oblique plane) at 50 ms resolution was obtained during Valsalva maneuver ( $2 \times 2 \text{ mm}^2$  resolution, 8 mm thickness). The arrow indicates the formation of the hernia during bolus regurgitation. For details see text and Figure 2B.

**Movie S14: Real-time MRI of gastroesophageal swallowing in a 64-year-old female patient of achalasia.** The image series (coronal oblique plane) at 50 ms resolution was obtained during swallowing ( $2 \times 2 \text{ mm}^2$  resolution, 8 mm thickness). The arrow indicates the narrow pathway of bolus transport. For details see text and Figure 2C.

**Movie S15: Real-time MRI of the gastroesophageal swallowing in a 68-year-old female patient with telescoping oesophagus after fundoplication.** The image series (sagittal plane) at 50 ms resolution was obtained during swallowing ( $2 \times 2 \text{ mm}^2$  resolution, 8 mm thickness). The upper and lower arrows indicate the sphincter and the narrow pathway of bolus transport, respectively. For details see text and Figure 2D.

**Movie S16: Real-time MRI of the gastroesophageal swallowing in a 62-year-old female patient of thoracic stomach.** The image series (coronal oblique plane) at 50 ms resolution was obtained during swallowing ( $2 \times 2 \text{ mm}^2$  resolution, 8 mm

thickness). The arrow indicates the bolus transport. For details see text and Figure 2E.

**Movie S17: Real-time MRI of the gastroesophageal swallowing in a 20-year-old female patient of functional heartburn.** The image series (coronal oblique plane) at 50 ms resolution was obtained during swallowing ( $2 \times 2 \text{ mm}^2$  resolution, 8 mm thickness). For details see text and Figure 2F.

**Figure S18**

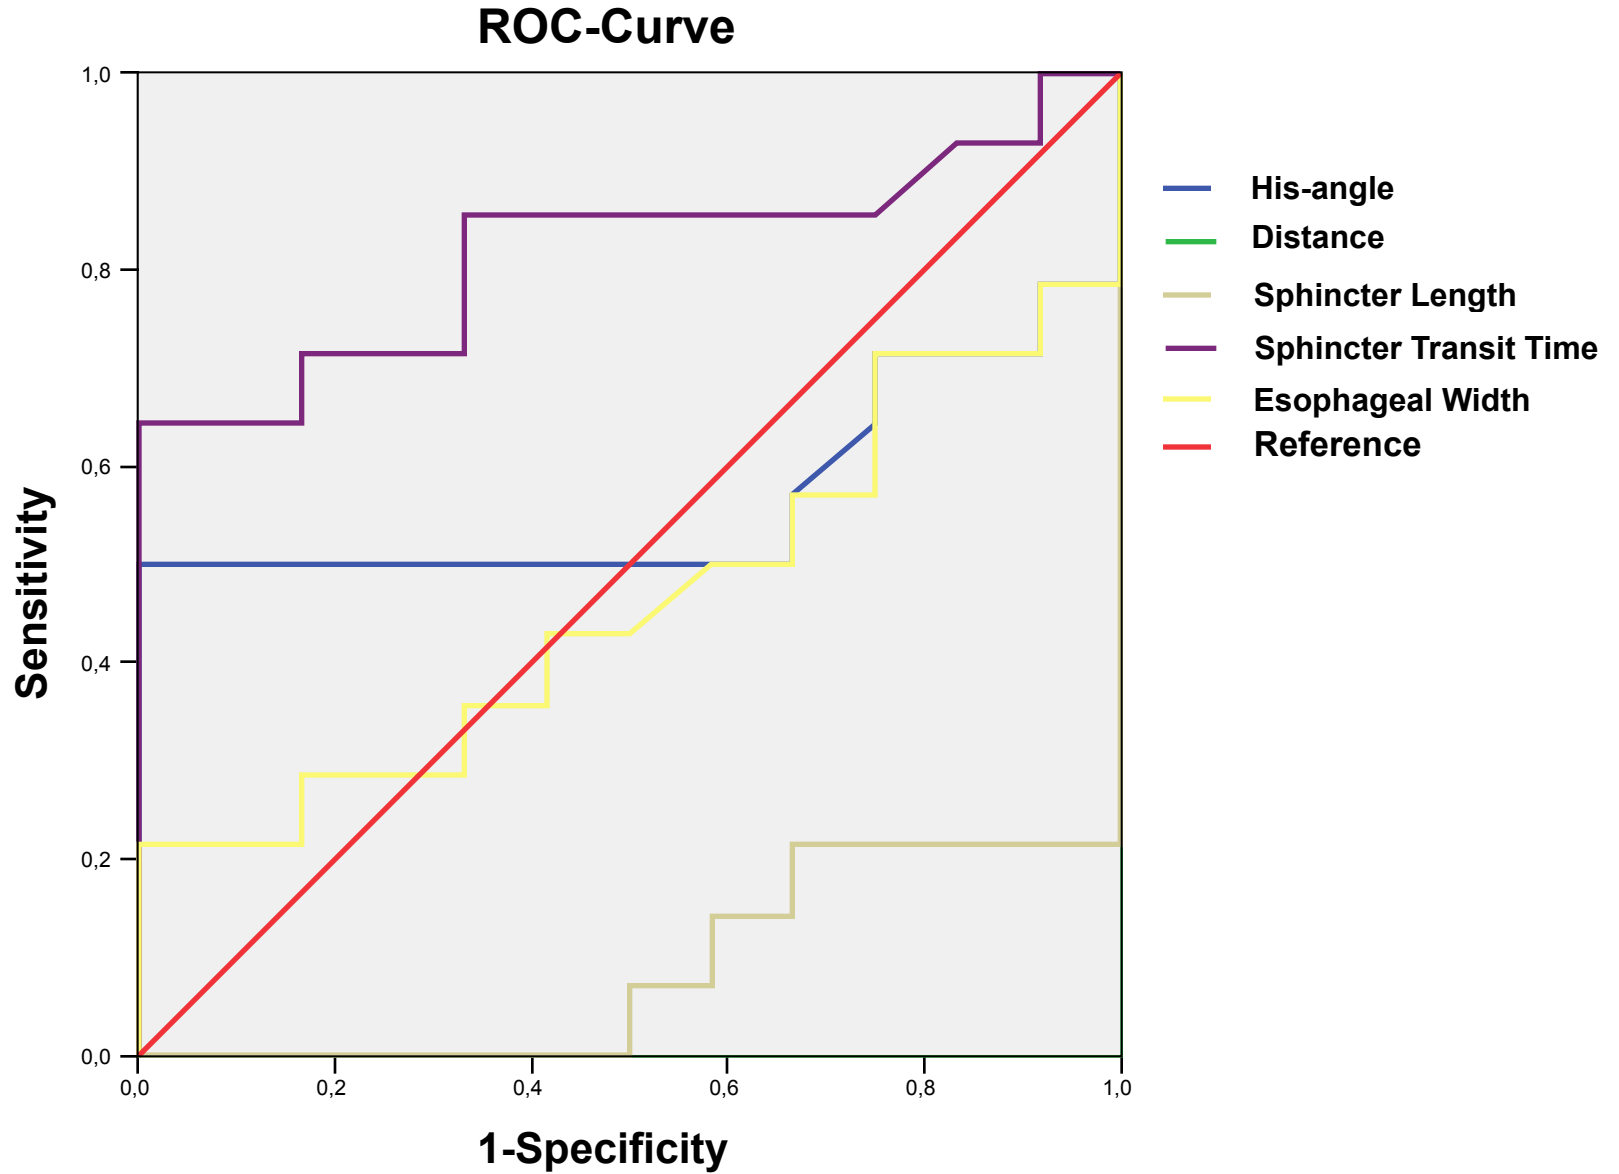



## Table S19

### Area under the curve for receiver operating characteristic (ROC)

|                        |       |
|------------------------|-------|
| His Angle              | 0.568 |
| Distance               | 0.000 |
| Sphincter Length       | 0.089 |
| Sphincter Transit Time | 0.818 |
| Esophageal Width       | 0.461 |
